1 **Triple A patient cells suffering from mitotic defects fail to localize PGRMC1 to mitotic kinetochore**  
2 **fibers**

3  
4 Ramona Jühlen<sup>a,†,\*</sup>, Dana Landgraf<sup>a</sup>, Angela Huebner<sup>a</sup>, and Katrin Koehler<sup>a,\*</sup>

5  
6 <sup>a</sup>Klinik und Poliklinik für Kinder- und Jugendmedizin, Medizinische Fakultät Carl Gustav Carus, Technische  
7 Universität Dresden, 01307 Dresden, Germany.

8  
9 <sup>†</sup>Present address: Institute for Molecular Biology and Medicine, Université Libre de Bruxelles, 6041  
10 Charleroi, Belgium.

11  
12 \*Address correspondence to: Katrin Köhler ([katrin.koehler@uniklinikum-dresden.de](mailto:katrin.koehler@uniklinikum-dresden.de)) or Ramona Jühlen  
13 ([rjuhlen@ulb.ac.be](mailto:rjuhlen@ulb.ac.be)).

14  
15 **Running head:** Cell division in ALADIN mutated cells

16  
17 **Abbreviations:** ALADIN, alacrima-achalasia-adrenal insufficiency neurologic disorder; CYP, cytochrome  
18 P450; ER, endoplasmic reticulum; GFP, green fluorescent protein; NADPH, Nicotinamide adenine  
19 dinucleotide phosphate; NUP, nucleoporin; PGRMC1 and 2, progesterone receptor membrane component 1  
20 and 2

21  
22 **Keywords:** ALADIN, kinetochore fibers, mitosis, nuclear pore complex, PGRMC1, PGRMC2, triple A  
23 syndrome.

## 24 HIGHLIGHT SUMMARY

- 25 • Investigating cell division in human adrenal cells we show that proliferation is decreased upon over-  
26 expression of ALADIN, PGRMC1 or PGRMC2.
- 27 • In immunofluorescence experiments using human adrenal cells and triple A patient fibroblasts we  
28 observed that during cell division PGRMC1 localizes to the microtubule kinetochore-fibers in  
29 metaphase and to the mid-body in telophase.
- 30 • Depletion of ALADIN results in mis-localization of Aurora A and PGRMC1 in metaphase cells of  
31 the human adrenal cell line and fibroblasts derived from patients with triple A syndrome.
- 32 • In real time PCR using RNA of fibroblasts of triple A syndrome patients and healthy controls we  
33 measured an increased expression of PGRMC2 in cells with ALADIN mis-function compared to the  
34 control cells.
- 35 • We hypothesize that a loss of the regulatory interaction between ALADIN and PGRMC2 leads to an  
36 over-regulation and over-expression of PGRMC2 and displaces PGRMC1 at the metaphase spindle.  
37 This diminishing of PGRMC1 concentration at kinetochore fibers may lead to mitotic errors and pro-  
38 liferation arrest.

39

## 40 ABSTRACT

41 Membrane-associated progesterone receptors are restricted to the endoplasmic reticulum and are shown to  
42 regulate the activity of cytochrome P450 enzymes which are involved in steroidogenesis or drug  
43 detoxification. PGRMC1 and PGRMC2 belong to this group of microsomal receptors and are of interest due  
44 to their suspected role during cell cycle. PGRMC1 and PGRMC2 are thought to bind to each other thereby  
45 suppressing entry into mitosis. We could previously report that PGRMC2 interacts with the nucleoporin  
46 ALADIN which when mutated results in the autosomal recessive disorder triple A syndrome. ALADIN is a  
47 novel regulator of mitotic controller Aurora kinase A and depletion of this nucleoporin leads to microtubule  
48 instability. In the current study, we present that proliferation is decreased when ALADIN, PGRMC1 or  
49 PGRMC2 are over-expressed. Furthermore, we find that depletion of ALADIN results in mis-localization of  
50 Aurora kinase A and PGRMC1 in metaphase cells. Additionally, PGRMC2 is over-expressed in triple A  
51 patient fibroblasts. Our results emphasize the possibility that loss of the regulatory interaction between  
52 ALADIN and PGRMC2 gives rise to a depletion of PGRMC1 at kinetochore fibers and to mitotic errors.  
53 This observation may explain part of the symptoms seen in triple A syndrome patients.

## 54 INTRODUCTION

55 ALADIN is a scaffold nucleoporin (NUP) anchored within the nuclear pore complex by the transmembrane  
56 NUP NDC1 (Kind *et al.*, 2009; Yamazumi *et al.*, 2009). ALADIN seems to be involved in building the  
57 structural scaffold backbone of the nuclear pore complex (Rabut *et al.*, 2004). Over the last years it has been  
58 shown that nuclear pore complexes and its NUPs have fundamental functions beyond nucleo-cytoplasmic  
59 transport and control cellular dysfunction in a variety of cellular pathways, especially during mitosis  
60 (Fahrenkrog, 2014; Nofrini *et al.*, 2016; Sakuma and D'Angelo, 2017). The first report that ALADIN plays a  
61 role during cell division was published in 2015 (Carvalho *et al.*, 2015). In cooperation with Carvalho *et al.*  
62 we proposed ALADIN as novel regulator of mitotic kinase Aurora kinase A and showed that depletion of the  
63 nucleoporin resulted in impaired mitotic spindle assembly and chromosomal alignment at the metaphase  
64 plate (Carvalho *et al.*, 2015). Furthermore, we could recently document that ALADIN is necessary for  
65 murine oocyte maturation and for specific stages during meiosis (Carvalho *et al.*, 2017).

66 Mutations in the human *AAAS* gene, coding for the protein ALADIN, lead to the autosomal recessive  
67 disorder named triple A syndrome (Tullio-Pelet *et al.*, 2000; Handschug *et al.*, 2001). Triple A patients  
68 present with three distinct symptoms: absent adrenal glucocorticoid and mineralocorticoid synthesis (adrenal  
69 insufficiency), impaired movement of the stomach cardia (achalasia) and loss of tear production (alacrima)  
70 (Allgrove *et al.*, 1978). These symptoms are highly heterogeneous and are accompanied by progressive  
71 impairments of the central, peripheral or autonomous nervous system (Allgrove *et al.*, 1978). Most mutations  
72 in *AAAS* result in a mis-localization of ALADIN to the cytoplasm (Cronshaw and Matunis, 2003; Krumbholz  
73 *et al.*, 2006).

74 Previously, we identified microsomal PGRMC2 as novel interactor for the nucleoporin ALADIN and  
75 provided new insights into the molecular function of the nucleoporin in the pathogenesis of triple A  
76 syndrome (Jühlen *et al.*, 2016). PGRMC2 belongs to the group of membrane-associated progesterone  
77 receptors. These receptors are restricted to the endoplasmic reticulum (ER) and are thought to regulate the  
78 activity of microsomal cytochrome (CYP) P450 enzymes which are involved in steroidogenesis or drug  
79 detoxification (Cahill and Medlock, 2017). The first identified membrane-associated progesterone receptor,  
80 PGRMC1, gained wide-spread attention due to its several implications in cancerogenesis (Falkenstein *et al.*,  
81 1996; Clark *et al.*, 2016; Kabe *et al.*, 2016; Ryu *et al.*, 2017). The mixed-function oxidase system of CYP  
82 P450 enzymes requires a donor transferring electrons from NADPH to reduce the prosthetic heme group  
83 (Pandey and Flück, 2013). PGRMC1 and PGRMC2 contain a CYP b5-similar heme-binding domain (Ryu *et al.*  
84 *et al.*, 2017). PGRMC1 forms stable protein-protein complexes with CYP51A1, CYP7A1, CYP21A2 and  
85 CYP3A4 (Hughes *et al.*, 2007). Additionally, PGRMC1 is able to activate CYP19 aromatase (Ahmed *et al.*,  
86 2012). PGRMC1 is shown to physiologically affect cholesterol/steroid biosynthesis and metabolism (Ryu *et al.*  
87 *et al.*, 2017). It is known that PGRMC2 has similar interaction potential, alters activity of CYP3A4 as possible  
88 electron donor, and binds CYP21A2 (Albrecht *et al.*, 2012; Wendler and Wehling, 2013). Most recently,  
89 both PGRMC1 and PGRMC2 were identified as putative interacting partners of ferrochelatase, an enzyme  
90 catalyzing the terminal step in the heme biosynthetic pathway, thereby possibly controlling heme release as

91 chaperone or sensor (Piel *et al.*, 2016). Interaction of ALADIN with PGRMC2 at the perinuclear ER could  
92 influence CYP P450 enzyme activity through electron transfer from NADPH and/or control heme synthesis.  
93 In triple A syndrome, altered CYP P450 enzyme activity would consecutively contribute to adrenal atrophy  
94 (Jühlen *et al.*, 2016).

95 Human PGRMC1 and PGRMC2 share 67 % of their protein sequence (Cahill, 2017; Cahill and  
96 Medlock, 2017). Deficiency of either PGRMC1 or PGRMC2 decreases the anti-apoptotic and anti-mitotic  
97 action of progesterone (Peluso *et al.*, 2014). Additionally, increased expression of PGRMC1 or PGRMC2  
98 inhibits entry into cell cycle (Griffin *et al.*, 2014; Peluso *et al.*, 2014). On the one hand, PGRMC1 is  
99 distributed with  $\beta$ - and  $\gamma$ -tubulin to the mitotic bipolar spindle and spindle poles in metaphase cells and on  
100 the other hand, with Aurora kinase B in meiotic cells (Luciano *et al.*, 2010; Lodde and Peluso, 2011).  
101 Furthermore, PGRMC1 is thought to regulate microtubule stability (Griffin *et al.*, 2014). PGRMC2 is shown  
102 to localize to the mitotic spindles in metaphase and anaphase cells and shall interact with cyclin-dependent  
103 kinase 11B (p58) (Griffin *et al.*, 2014). PGRMC1 and PGRMC2 are reported to interact and furthermore, to  
104 bind to each other during metaphase, thereby suppressing entry into cell cycle (Peluso *et al.*, 2014).

105 Interestingly, in a large scale interactome mapping of the centrosome-cilium interface the  
106 nucleoporin ALADIN and both microsomal PGRMC1 and PGRMC2 have been identified to localize to the  
107 cilium transition zone (Hanson *et al.*, 2014; Gupta *et al.*, 2015). The centrosome is an important regulator of  
108 cell cycle progression and mitotic spindle assembly (Scholey *et al.*, 2003). Furthermore, ALADIN is strongly  
109 dephosphorylated during mitotic exit, whereas PGRMC1 and PGRMC2 are phosphorylated during early  
110 mitotic exit (Malik *et al.*, 2009; McCloy *et al.*, 2015). Obviously, ALADIN, PGRMC1 and PGRMC2 seem  
111 to have critical roles for the formation and function of the mitotic spindle apparatus in somatic cells.

112 Here, we report that proliferation in human adrenal cells is decreased after increased expression of  
113 ALADIN, PGRMC1 or PGRMC2. We show that PGRMC1 localizes to the microtubule kinetochore-fibers  
114 in metaphase and to the midbody in telophase of human adrenal cells and fibroblasts. Further, we present that  
115 PGRMC1 and Aurora kinase A are mislocalized in metaphase triple A patient fibroblasts. We observed that  
116 patient fibroblasts present with increased expression of PGRMC2 and we hypothesize that a depletion of  
117 ALADIN in these cells leads to a dysregulation of PGRMC2 and displaces PGRMC1 at the metaphase  
118 spindle.

## 119 RESULTS AND DISCUSSION

### 120 Adrenal cell proliferation is decreased upon over-expression of ALADIN, PGRMC1 or PGRMC2 and 121 down-regulation of ALADIN

122 In primary skin fibroblasts of triple A patients the cellular proliferation rate is decreased and doubling time  
123 of patient cells is significantly increased compared to cells of healthy donors (Kind *et al.*, 2010).  
124 Additionally, patient cells show features of senescence even though these cells have not reached replicative  
125 senescence as it has been documented for normal skin fibroblasts (Lee *et al.*, 2002; Kind *et al.*, 2010). The  
126 nucleoporin ALADIN is ubiquitously expressed with predominant expression in adrenal gland,  
127 gastrointestinal and central nervous system structures (Huebner *et al.*, 2002). That may be a reason why  
128 patients with triple A syndrome present with characteristic pathogenesis in distinct tissues: adrenal  
129 insufficiency, achalasia, alacrima and involvement of the central, peripheral and autonomous nervous system  
130 (Allgrove *et al.*, 1978). In order to address the pathogenesis in adrenal tissue in the patients, we reported that  
131 loss of ALADIN leads to an impairment of glucocorticoid and mineralocorticoid synthesis in adrenal cells *in*  
132 *vitro* (Jühlen *et al.*, 2015).

133 To test whether depletion of ALADIN also results in decreased cellular proliferation in adrenal cells  
134 we used inducible adrenocortical NCI-H295R1-TR cells stably expressing *AAAS* shRNA (*AAAS* knock-down)  
135 and monitored cellular proliferation using live cell imaging for at least 65 h. *AAAS* knock-down resulted in  
136 decreased proliferation in adrenal cells (growth constant  $k$  (slope of linear regression line) =0.044) compared  
137 to control cells expressing a scrambled shRNA ( $k=0.062$ ) (wild-type cells:  $k=0.2$ ) (**Figure 1A**). Surprisingly,  
138 in live cell imaging stable over-expression of N-terminal-GFP-tagged ALADIN in adrenocortical NCI-  
139 H295R cells also impaired cellular proliferation ( $k=0.082$ ) compared to over-expression of GFP alone in  
140 these cells ( $k=0.305$ ) (wild-type cells:  $k=0.16$ ) (**Figure 1B**). It can be assumed that an equilibrated level of  
141 ALADIN protein is prerequisite for successful cellular proliferation and that depletion or accumulation of the  
142 nucleoporin impairs cellular proliferation. That hypothesis that an equilibrated level of ALADIN is critical  
143 for cell division was already postulated by Carvalhal *et al.* (Carvalhal *et al.*, 2015).

144 We firstly investigated, whether cellular proliferation defects are caused by diminished expression of  
145 the nucleoporin ALADIN. Secondly, we wanted to know whether an over-expression of PGRMC2, a novel  
146 discovered interactor of the nucleoporin ALADIN, impairs the function during proliferation. In ovarian  
147 granulosa cells levels of PGRMC2 decrease during G1 phase of cell cycle (Griffin *et al.*, 2014). Increased  
148 expression of PGRMC1 or PGRMC2 in these cells is documented to suppress entry into cell cycle (Griffin *et*  
149 *al.*, 2014; Peluso *et al.*, 2014). During metaphase both proteins are thought to interact and to impair  
150 progression of cell cycle (Peluso *et al.*, 2014). During live cell imaging we observed that transient over-  
151 expression of C-terminal-GFP-tagged PGRMC2 in adrenocortical NCI-H295R cells resulted in decreased  
152 cellular proliferation ( $k=0.034$ ) (**Figure 1B**). The same phenotype was seen in adrenocortical cells transiently  
153 over-expressing N-terminal-GFP-tagged PGRMC1 ( $k=0.015$ ) (**Figure 1B**). These results are in accordance  
154 with the literature and emphasize a simultaneous role of PGRMC1 and PGRMC2 during cellular

155 proliferation.

156

### 157 **PGRMC1 is restricted to metaphase spindle during mitosis and mid-body during cytokinesis**

158 Next we determined the localization of PGRMC1 and PGRMC2 during cell division in adrenal cells. So far,  
159 we saw that over-expression of ALADIN, PGRMC1 or PGRMC2 leads to an impairment of adrenal cellular  
160 proliferation (**Figure 1B**). Thus, we assumed that each of these proteins plays an important role during  
161 regulation of cell division. It is known that ALADIN is a novel regulator of mitotic controller Aurora kinase  
162 A (Carvalho *et al.*, 2015). Humans have three classes of serine/threonine Aurora kinases: Aurora A, Aurora  
163 B and Aurora C (Marumoto *et al.*, 2005). The homologous Aurora kinase A and Aurora kinase B are  
164 expressed in most cell types. Despite different localization and activation during cell cycle, they both  
165 regulate progression through cell cycle from G2 phase to cytokinesis (Marumoto *et al.*, 2005). In *Drosophila*  
166 ALADIN diffuses loosely through the spindle during mitosis (Carvalho *et al.*, 2015). In HeLa cells  
167 ALADIN could be found within the mitotic spindle accumulated at spindle poles but the highest amount  
168 appeared between centrosome and metaphase plate (Carvalho *et al.*, 2015). This high concentration of  
169 ALADIN protein is thought to be an ER-membrane-associated pool of the nucleoporin since it partially co-  
170 localizes with calnexin which is an integral microsomal protein (Carvalho *et al.*, 2015). PGRMC1 and  
171 PGRMC2 are documented to localize to the mitotic spindle apparatus in metaphase ovarian granulosa cells  
172 but their role at the spindle apparatus and during cell cycle is not known (Lodde and Peluso, 2011; Griffin *et*  
173 *al.*, 2014).

174 Firstly, using immunofluorescence in adrenal NCI-H295R cells we show that PGRMC1 throughout  
175 prophase and metaphase localized to the centrosome, bipolar spindle and spindle poles (**Figure 2A**). During  
176 anaphase PGRMC1 diffuses weakly around chromosomes and in telophase before cytokinesis (cell-cell  
177 scission) PGRMC1 localizes to the mid-body (**Figure 2A**). Secondly, during prophase PGRMC1 partially  
178 co-localizes with mitotic Aurora kinase A (AURKA) to the centrosome and during metaphase and telophase  
179 to spindle poles and mid-body (**Figure 2A**). During telophase and cell-cell scission PGRMC1 could also be  
180 found with mitotic Aurora kinase B (AURKB) at the mid-body (**Figure 2B**). PGRMC1 has been documented  
181 to associate with Aurora kinase B during meiosis but no such role has been assigned during mitosis (Luciano  
182 *et al.*, 2010). Both Aurora kinase A and Aurora kinase B phosphorylate and thereby regulate a variety of  
183 mitotic spindle substrates. Dysregulation of these kinases results in fatal mitotic errors (Marumoto *et al.*,  
184 2005). Aurora kinase A has distinct roles in centrosome maturation, entry into mitosis, spindle assembly and  
185 microtubule (MT) function during anaphase. Aurora kinase B is essential for bi-orientation of chromosomes  
186 and cytokinesis (Barr and Gergely, 2007). It is tempting to assume that PGRMC1 is a substrate being  
187 phosphorylated by one or both of these mitotic kinases and indeed, PGRMC1 has been found to be  
188 phosphorylated at three postulated serines during early mitotic exit (McCloy *et al.*, 2015). Further research  
189 should address whether PGRMC1 is phosphorylated by Aurora kinases and should uncover the regulatory  
190 effect during mitosis of phosphorylation on one of the three postulated serines in PGRMC1.

191 PGRMC1 efficiently localizes with  $\alpha$ - (TUBA) and  $\beta$ -tubulin (TUBB) to metaphase bipolar spindles



192 in adrenal NCI-H295R cells (**Figure 2B**). It has already been documented that PGRMC1 interacts with  $\beta$ -  
193 tubulin that is one of the two main components of MTs which are built from heterodimers of  $\alpha$ - and  $\beta$ -tubulin  
194 (Scholey *et al.*, 2003; Lodde and Peluso, 2011). Heterodimers are arranged in a head-to-tail fashion into  
195 protofilaments whereby in humans 13 of such protofilaments laterally arrange into tubular structures of about  
196 25 nm diameter (Meunier and Vernos, 2012). Within MTs  $\alpha$ - and  $\beta$ -tubulin heterodimers reveal a distinct  
197 intrinsic polarity in which the minus-end confers to the end where  $\alpha$ -tubulin is exposed and the plus-end  
198 where  $\beta$ -tubulin is exposed (Meunier and Vernos, 2012). Microtubule polymerization is done at the  $\beta$ -tubulin  
199 plus-end and initial nucleation of MTs is facilitated by  $\gamma$ -tubulin including a complex of several proteins  
200 (Meunier and Vernos, 2012). Microtubules undergo dynamic cycles of polymerization and de-  
201 polymerization which is called dynamic instability and is achieved by a variety of regulatory proteins  
202 (Meunier and Vernos, 2012). Co-localization of PGRMC1 with  $\beta$ - and  $\gamma$ -tubulin has been proposed before,  
203 but a direct interaction of PGRMC1 could only be shown for  $\beta$ -tubulin (Lodde and Peluso, 2011). Here, we  
204 show that  $\beta$ -tubulin is a positive target for a novel interaction with PGRMC1 and that association of  
205 PGRMC1 with  $\beta$ -tubulin possibly influences polymerization at plus-ends of MTs during mitosis.  
206 Furthermore, we show that PGRMC2 was loosely to the mitotic spindle in adrenal metaphase cells and  
207 weakly co-localized with PGRMC1 during mitosis (**Figure 2B**). In interphase cells we previously reported  
208 that PGRMC2 co-localizes with the nucleoporin ALADIN to the perinuclear space (Jühlen *et al.*, 2016).  
209 Here, it appeared that PGRMC2 like ALADIN diffuses loosely in mitotic cells and that only PGRMC1 could  
210 be efficiently restricted to the mitotic bipolar spindle (schematically summarized in **Figure 2C**). It is known  
211 that PGRMC1 and PGRMC2 interact to suppress entry into cell cycle (Peluso *et al.*, 2014). With  
212 immunofluorescence we could however not target PGRMC2 to the same site as PGRMC1 during mitosis.  
213 Thus, we hypothesize that PGRMC2 plays a distinct role in regulating the function of PGRMC1 at the  
214 mitotic spindle and presumably during cell division.

215

#### 216 **Loss of ALADIN results in mis-localization of PGRMC1 and Aurora kinase A during metaphase**

217 We have previously shown that the nucleoporin ALADIN interacts with microsomal PGRMC2 and that  
218 ALADIN is a new important co-factor of mitotic controller Aurora kinase A (Carvalho *et al.*, 2015; Jühlen  
219 *et al.*, 2016). It is thought that PGRMC2 binds its protein homologue PGRMC1 resulting in suppression of  
220 cell cycle (Peluso *et al.*, 2014). Here, we demonstrate that over-expression of ALADIN, PGRMC1 or  
221 PGRMC2 in adrenal cells leads to impaired cellular proliferation (**Figure 1B**), and that PGRMC1 is  
222 restricted to the mitotic bipolar spindle (**Figure 2**). Since both ALADIN and PGRMC2 loosely diffuse in  
223 mitotic cells compared to PGRMC1 (**Figure 2C**), we assume that ALADIN and PGRMC2 possibly exploit a  
224 regulatory role during cell division. Elucidating this novel role for ALADIN during cell division shall  
225 establish new avenues in explaining parts of the pathogenesis in triple A syndrome. We recently showed that  
226 a depletion of ALADIN in triple A patient fibroblasts affects the localization of PGRMC2 at the perinuclear  
227 ER (Jühlen *et al.*, 2016). Thus, we now tested the effect of over-expression or depletion of ALADIN on the  
228 localization of PGRMC1 and Aurora kinase A. We used stable GFP-ALADIN over-expressing and inducible

229 *AAAS* knock-down adrenocortical cells as well as skin fibroblasts from triple A patients. For this purpose, we  
230 chose patient cells with three different, and *in vivo* frequently occurring homozygous mutations in the *AAAS*  
231 gene: a donor splice mutation IVS14+1G>A (IVS14), a point mutation c.787T>C leading to the missense  
232 mutation S263P and a point mutation c.884G>A leading to the nonsense mutation W295X.

233 Using immunofluorescence we revealed that stable GFP-ALADIN over-expressing adrenocortical  
234 NCI-H295R cells failed to correctly localize Aurora kinase A to metaphase spindle poles (**Figure 3, A and**  
235 **B**, top panels). Aurora kinase A was not restricted to spindle poles in these cells but spread outward onto MT  
236 spindles compared to control cells over-expressing GFP (**Figure 3, A and B**, top panels). The same  
237 phenotype could be seen in inducible adrenocortical NCI-H295R1-TR cells depleted for ALADIN compared  
238 to control cells expressing scrambled shRNA (**Figure 3, A and B**, middle panels). Aurora kinase A normally  
239 resides at the centrosome and spindle poles where it regulates centrosome maturation and MT spindle  
240 assembly (Barr and Gergely, 2007). Carvalho *et al.* reported that mitotic HeLa cells depleted for or over-  
241 expressing ALADIN have less Aurora kinase A at centrosomes and higher amounts of it at spindle fibers  
242 (Carvalho *et al.*, 2015). Our findings further prove that ALADIN partially regulates mitotic Aurora kinase A  
243 and raise the question why an equilibrated level of ALADIN protein is of great importance for proper  
244 localization of Aurora kinase A. Localization of PGRMC1 was altered in adrenocortical cells depleted for  
245 ALADIN (**Figure 3, A and B**, middle panels). PGRMC1 was still correctly targeted to the bipolar MT  
246 spindle but distribution onto spindle fibers did not fully extend onto chromosomal kinetochores compared to  
247 control scrambled shRNA-expressing cells (**Figure 3, A and B**, middle panels). Only depletion of ALADIN  
248 and not over-expression affected localization of PGRMC1 in mitotic cells. We know that ALADIN directly  
249 regulates Aurora kinase A and therefore, any change in level of ALADIN protein alters Aurora kinase A  
250 localization and function during mitosis (Carvalho *et al.*, 2015). As only depletion of ALADIN alters  
251 localization of PGRMC1 in immunofluorescence, it can be assumed that during mitosis ALADIN not  
252 directly regulates PGRMC1 but does so rather through secondary mechanisms.

253 Next, we tested our assumptions using fibroblasts from triple A patients. It has been described that  
254 triple A patient fibroblasts present with disorganized metaphase plates, shorter MT spindles and less active  
255 Aurora kinase A at spindle poles (Carvalho *et al.*, 2015). Here we show in patient fibroblasts that ALADIN  
256 depletion results in poleward spread of Aurora kinase A onto metaphase spindles and moreover, in  
257 accumulation in the cytoplasm (**Figure 3, A and B**, bottom panels). The highest accumulation of Aurora  
258 kinase A in the cytoplasm was seen in patient cells carrying the ALADIN missense mutation S263P and the  
259 nonsense mutation W295X (**Figure 3, A and B**, bottom panels). PGRMC1 was correctly restricted to the  
260 metaphase bipolar spindle with little decreased spread in direction of kinetochore chromosomes as seen in  
261 adrenocortical cells depleted for ALADIN (**Figure 3, A and B**, bottom panels). Nevertheless, PGRMC1 also  
262 accumulated in the cytosol of triple A fibroblasts with highest levels in patient cells carrying the missense  
263 mutation S263P and the nonsense mutation W295X (**Figure 3, A and B**, bottom panels). Thus,  
264 immunofluorescence results in triple A patient fibroblasts verified our previous findings and patient cells  
265 even presented with a more profound phenotype regarding Aurora kinase A and PGRMC1 mis-localization



266 than adrenocortical ALADIN knock-down cells.

267 Our recent work presented that depletion of ALADIN alters the localization of PGRMC2 in triple A  
268 patient fibroblasts and leads to an increased level of PGRMC2 at the perinuclear ER (Jühlen *et al.*, 2016).  
269 Furthermore, we showed that adrenal tissue of female ALADIN knock-out mice exploits higher levels of  
270 PGRMC2 protein compared to female wild-type animals (Jühlen *et al.*, 2016). Here we show that fibroblasts  
271 from triple A patients carrying the ALADIN missense mutation S263P or the nonsense mutation W295X had  
272 about two-fold increased levels of PGRMC2 on mRNA and protein level compared to anonymized healthy  
273 control fibroblasts (**Figure 4, A and B**). Cells from the patient carrying the donor splice mutation IVS14  
274 presented also with increased protein levels of PGRMC2 but quantitative real-time PCR data was not  
275 significant (**Figure 4, A and B**). We hypothesize that increased levels of PGRMC2 in fibroblasts from triple  
276 A patients result from the loss of ALADIN in these cells. Furthermore, we assume since ALADIN is a novel  
277 interactor of PGRMC2 that ALADIN negatively regulates microsomal PGRMC2. A direct or indirect  
278 negative regulation of PGRMC2 results in accumulation of PGRMC2 upon ALADIN depletion. We revealed  
279 that ALADIN depleted patient fibroblasts fail to correctly target PGRMC1 fully to the mitotic spindle fibers,  
280 instead PGRMC1 accumulates in the cytosol. Levels of PGRMC1 mRNA were not altered in these cells  
281 (**Figure S1**) and we already presented that over-expression of either PGRMC1 or PGRMC2 impairs cellular  
282 proliferation (**Figure 1B**). Based on the finding that PGRMC1 interacts with PGRMC2, we think that  
283 increased levels of PGRMC2 displace PGRMC1 from its correct localization at the mitotic spindle and target  
284 PGRMC1 with PGRMC2 to the cytosol impairing cell division and proliferation. Over-expression of  
285 PGRMC1 alone would probably also result in the same phenotype while targeting high amount of PGRMC1  
286 to the cytoplasm.

287 Adrenocortical ALADIN knock-down cells did not present with alteration of *PGRMC2* expression  
288 (Jühlen *et al.*, 2016). Additionally, in immunofluorescence during mitosis PGRMC1 and Aurora kinase A  
289 were not targeted to the cytosol in these cells (**Figure 3, A and B**, middle panels). Moreover, fibroblasts  
290 from the patient carrying the donor splice mutation IVS14 had less PGRMC1 and Aurora kinase A targeted  
291 to the cytosol (**Figure 3, A and B**, bottom panels). Future research has to address in more detail whether the  
292 loss of regulation of PGRMC2 and Aurora kinase A is dependent on different levels in ALADIN protein and  
293 on different kinds of mutations in the *AAAS* gene. With our previous work we have given evidence, that  
294 depletion of ALADIN impairs mitotic cell division and can explain parts of the pathogenesis of triple A  
295 syndrome. Our new results shall be the basis for more extended research focusing on mis-regulated  
296 PGRMC2 and Aurora kinase A due to loss of ALADIN.

297

### 298 **PGRMC1 localizes to microtubule (MT) kinetochore fibers**

299 The mature bipolar mitotic spindle is made from different subclasses of MTs depending on their position,  
300 functionality and organization: astral MTs, interpolar MTs and kinetochore-fibers (K-fibers) (**Figure 1C**)  
301 (Meunier and Vernos, 2012). Astral MTs connect the centrosome with the cell cortex and regulate  
302 centrosome separation and spindle positioning (Rosenblatt, 2005). However, it has been shown that mitosis

303 can occur without astral MTs (Khodjakov *et al.*, 2000; Mahoney *et al.*, 2006). The main body of the mitotic  
304 spindle is made up by dynamic interpolar MTs. Interpolar MTs originate from the centrosome towards the  
305 center of the spindle and connect in an anti-parallel fashion with interpolar MTs originating from the  
306 opposite spindle pole (Meunier and Vernos, 2012). Some interpolar MTs however are shorter and do not  
307 emanate have way through the mitotic spindle (Mastronarde *et al.*, 1993). Interpolar MTs are the main  
308 component of the central spindle during anaphase and maintain spindle polarity and chromosome segregation  
309 (Glotzer, 2009; Vanneste *et al.*, 2011). However, interpolar MTs only indirectly establish chromosome  
310 segregation because this function is facilitated by K-fibers (Meunier and Vernos, 2012). K-fibers are big  
311 bundles of 20-40 parallel MTs and are responsible of chromosomes attachment to spindle poles and facilitate  
312 sister chromatid segregation (McEwen *et al.*, 1997; Meunier and Vernos, 2012). K-fibers are less dynamic  
313 and therefore have an average half-life of 4-8 min comparable to that of interphase MTs with 9-10 min  
314 (Bakhoun *et al.*, 2009; Meunier and Vernos, 2012). The average half-lives of astral and interpolar MTs are  
315 less than 1 min (Zhai *et al.*, 1995; Meunier and Vernos, 2012). Therefore, K-fibers are the most stable MTs  
316 when exposed to cold or depolymerizing agents like nocodazole.

317 From previous work we know that a loss of ALADIN negatively affects K-fiber stability (Carvalho  
318 *et al.*, 2015). Moreover, Lodde and Peluso showed that PGRMC1 affects microtubule stability and mitotic  
319 progression by the action of progesterone (Lodde and Peluso, 2011). As PGRMC1 localizes to the metaphase  
320 bipolar spindle and ALADIN depletion through PGRMC2 up-regulation negatively affects the targeting of  
321 PGRMC1 to the spindle, we were eager to find out whether PGRMC1 localizes to a distinct subclass of MTs  
322 during mitosis. We exposed cells before immunostaining to cold and observed whether PGRMC1 was still  
323 targeted to the spindle in mitotic cells. A positive result would exclude a localization of PGRMC1 to astral or  
324 interpolar MTs and would emphasize a role of PGRMC1 at K-fibers. Furthermore, we targeted known K-  
325 fiber proteins during immunofluorescence and observed the localization of PGRMC1 compared to these.  
326 These K-fiber proteins were firstly, TACC3 (also known as maskin) which is together with clathrin and  
327 chTOG (also known as CKAP5) responsible for K-fiber bundling and secondly NDC80 which belongs to the  
328 KMN complex (KNL1-MIS12-NDC80 complex) that attaches K-fiber plus-ends to the outer chromosomal  
329 kinetochore through polymerization and de-polymerization (Joglekar *et al.*, 2010; Booth *et al.*, 2011). In  
330 order to visualize the MT spindle we also stained for  $\alpha$ -tubulin (TUBA) and to observe the centromeric  
331 region we stained for CENPB (Ando *et al.*, 2002). We used adrenocortical NCI-H295R cells and additionally  
332 verified our results in a different cell type using human skin fibroblasts from healthy donors and from earlier  
333 mentioned triple A patients.

334 In **Figure 5, A and B**, we well document that after cold treatment PGRMC1 was still restricted to  
335 MT spindles in adrenocortical NCI-H295R cells and human skin fibroblasts.  $\alpha$ -tubulin still co-localized with  
336 PGRMC1 and thus, targeted PGRMC1 to cold-stable K-fibers (**Figure 5, A and B**). Furthermore,  
337 immunofluorescence of CENPB marked the centromeric region of the condensed chromosomes containing  
338 the kinetochore. It can be seen that PGRMC1-positive spindle K-fibers reached out to the centromeric region  
339 being attached by the KMN complex visualized by immunostaining of NDC80 (**Figure 5, A and B**).

340 Immunofluorescence of PGRMC1 further partly co-localizes with staining of the MT-bundling protein  
341 TACC3 in adrenocortical cells and skin fibroblasts (**Figure 5, A and B**). In **Figure 5C** the same  
342 immunofluorescence staining pattern can be seen in cold-treated skin fibroblasts from triple A patients  
343 carrying the donor splice mutation IVS14, the missense mutation S263P or the nonsense mutation W295X.  
344 However, these cells present with shorter and more diffuse K-fibers compared to fibroblasts from healthy  
345 donors (**Figure 5, B and C**). We hypothesize that this observation is due to the previously documented  
346 decreased stability of K-fibers upon ALADIN depletion (Carvalho *et al.*, 2015).  
347 In conclusion we document here that PGRMC1 localizes to cold-stable MT K-fibers in human adrenocortical  
348 cells and skin fibroblasts. We verify that K-fibers are less stable upon ALADIN loss of function in triple A  
349 patient fibroblasts and we present that these cells fail to target PGRMC1 efficiently to the mitotic spindle.  
350 Thus, we assume that part of the phenotype seen in triple A patient cells can be caused by a mis-regulated  
351 interaction between ALADIN and PGRMC2 resulting in mis-localization of PGRMC1 during mitosis and  
352 less stable K-fibers. Further studies are required to address the exact function of the microsomal protein  
353 PGRMC1 at K-fibers and to solve the question whether it is involved in MT bundling and/or MT maturation.

## 354 MATERIALS AND METHODS

### 355 *Cell culture*

356 All adrenal carcinoma NCI-H295R cells were cultured in DMEM/F12 medium (Lonza, Cologne, Germany)  
357 supplemented with 1 mM L-glutamine (Lonza, Cologne, Germany), 5% Nu-serum (BD Biosciences,  
358 Heidelberg, Germany), 1% insulin-transferrin-selenium) (Gibco, Life Technologies, Darmstadt, Germany)  
359 and 1% antibiotic-antimycotic solution (PAA, GE Healthcare GmbH, Little Chalfont, United Kingdom).

360 NCI-H295R cells stably expressing GFP-ALADIN fusion protein or GFP were generated as  
361 described previously using the gamma-retroviral transfer vectors pcz-CFG5.1-GFP-*AAAS* and pcz-CFG5.1-  
362 GFP (Kind *et al.*, 2009).

363 NCI-H295R1-TR cells stably expressing *AAAS* shRNA (*AAAS* knock-down) or scrambled shRNA  
364 were generated by our group as previously reported (Jühlen *et al.*, 2015). These cells were cultured with 100  
365 µg/ml zeocin (InvivoGen, Toulouse, France) supplemented in culture medium. Doxycycline hydrochloride  
366 (MP Biomedicals, Eschwege, Germany) was used at 1 µg/ml for 48 h to turn on the expression of the shRNA  
367 sequence.

368 Triple A patient skin fibroblasts and human anonymized control skin fibroblasts were obtained and  
369 cultured as described earlier (Kind *et al.*, 2010). All fibroblasts were cultured until passage 20 at the most.  
370 Informed consent was obtained from all subjects and experiments were approved by the local ethics review  
371 board (Medical Faculty, Technische Universität Dresden, EK820897).

372

### 373 *Transient adrenal cell transfection*

374 Cells were cultured for proliferation analysis in 24-well culture dishes at a density of  $0.4 \times 10^5$  cells/well or  
375 for immunofluorescence microscopy onto cover slips (Carl Zeiss, Jena, Germany) in 6-well culture dishes at  
376 a density of  $1.6 \times 10^5$  cells/well 24 h before subsequent transfections. Cells were transfected using X-treme  
377 GENE HP DNA transfection reagent (Roche Diagnostics, Mannheim, Germany). The plasmids for transient  
378 transfections pEGFP-C1-PGRMC1 and pCMV6-AC-PGRMC2-GFP vector (RG204682) (OriGene  
379 Technologies, Rockville MD, USA) were used at a concentration of 0.01 µg/µl at an optimized transfection  
380 ratio of 1:4 diluted in pure DMEM/F12. Proliferation was monitored after 24 h after transfection. Cells for  
381 immunofluorescence were fixed after 48 h.

382

### 383 *Proliferation analysis*

384 Cells were seeded in 24-well culture dishes at a density of  $0.4 \times 10^5$  cells/well 24 h before proliferation  
385 analysis. Confluence measurement was done using live cell imaging on IncuCyte Zoom (Essen BioScience,  
386 Ann Arbor MI, USA) over at least 65 h. Measurement was done at least in triplicate and experiments were  
387 repeated at least twice.

388

### 389 *Immunofluorescence microscopy*

390 Cells grown on glass cover slips were fixed with 4% PFA in PBS for 5 min, permeabilized with 0.5% Triton-

391 X-100 in PBS for 5 min and then fixed again. In order to assess K-fiber microtubule stability, cells were put  
392 on ice for 10 min prior fixation and permeabilization as reported elsewhere (Carvalho *et al.*, 2015). Blocking  
393 was performed with 2% BSA/0.1% Triton-X-100 in PBS for 30 min at room-temperature (RT).

394 All antibodies used for immunofluorescence were diluted in blocking solution. Primary antibodies  
395 anti-ALADIN (B-11: sc-374073) (1:25), anti-AURKA (C-1: sc-398814) (1:50), anti-AURKB (A-3: sc-  
396 393357) (1:50), anti-CENPB (F-4: sc-376283) (1:50), anti-NDC80 (C-11: sc-515550) (1:50), anti-PGRMC1  
397 (C-4: sc-393015) (1:50), anti-PGRMC2 (F-3: sc-374624) (1:50), anti-TACC3 (C-2: sc-376883) (1:50), anti-  
398 TUBA (DM1A: sc-32293) (1:50) and anti-TUBB (D-10: sc-5274) (1:50) (Santa Cruz Biotechnology Inc.,  
399 Heidelberg, Germany) were incubated at 4°C over-night in a humidified chamber. Secondary antibodies  
400 Alexa Fluor 488 goat anti-mouse IgM and Alexa Fluor 568 goat anti-mouse IgG (1:500) (Molecular Probes,  
401 Life Technologies) were incubated one hour at RT in the dark. Excess antibodies after primary and  
402 secondary antibody staining were removed by three washing steps using 0.1% Triton-X-100 in PBS for 5  
403 min. Cover slips were mounted onto microscope slides with VECTASHIELD mounting medium for  
404 fluorescence with DAPI (Vector Laboratories, Burlingame, CA, USA).

405 Fluorescence was imaged using the confocal laser scanning microscope Zeiss LSM 510 with Zeiss  
406 EC Plan-Neofluar 40x objective/ 1.3 Oil and the following lasers: diode 405 nm, Argon 488 nm and DPSS  
407 561 nm (Carl Zeiss). Images were acquired and processed using equipment of the Core Facility Cellular  
408 Imaging at the Medical Theoretical Centre in Dresden. The experiments were repeated at least three times.

409

#### 410 *RNA extraction, cDNA synthesis and quantitative real-time PCR*

411 Total RNA from cultured cells was isolated using the NucleoSpin RNA (Macherey-Nagel, Düren, Germany)  
412 according to the protocol from the manufacturer. Purity of the RNA was assessed using Nanodrop  
413 Spectrophotometer (ND-1000) (NanoDrop Technologies, Wilmington DE, USA). The amount of 500 ng of  
414 total RNA was reverse transcribed using the GoScript Reverse Transcription System (Promega, Mannheim,  
415 Germany) following the protocols from the manufacturer. Primers for the amplification of the target  
416 sequence were designed using Primer Express 3.0 (Applied Biosystems, Life Technologies) and compared to  
417 the human genome database for unique binding using BLAST search (National Center for Biotechnology  
418 Information, U.S. National Library of Medicine, 2013). Primers for *PGRMC1* (forward, reverse and probe)  
419 were used as previously described (Hlavaty *et al.*, 2016). The primer sequences are listed in the  
420 supplementary data of this article (**Table S1**).

421 The qPCR amplifications were performed in triplicates using the GoTaq Probe qPCR Master Mix  
422 (Promega) according to the manufacturer's reaction parameter on an ABI 7300 Fast Real-Time PCR System  
423 (Applied Biosystems, Life Technologies). In all results repeatability was assessed by standard deviation of  
424 triplicate  $C_t$ s and reproducibility was verified by normalizing all real-time RT-PCR experiments by the  $C_t$  of  
425 each positive control per run. The experiments were repeated at least five times.

426

#### 427 *Immunoblots*

428 After SDS-PAGE separation onto 4-12% PAGE (150 V for 1.5 h) and electroblotting (30 V for 1.5 h)  
429 (Invitrogen, Life Technologies) onto Amersham hybond-ECL nitrocellulose membrane (0.45  $\mu\text{m}$ ) (GE  
430 Healthcare GmbH, Little Chalfont, United Kingdom) non-specific binding of proteins to the membrane was  
431 blocked by incubation in PBS containing 3% BSA at RT.

432 The membrane was then probed with primary antibodies either anti-ACTB (clone AC-74) (1:40000  
433 in 3% PBS/BSA) (Sigma-Aldrich, Munich, Germany), anti-PGRMC1 (C-4: sc-393015) (1:100 in 3%  
434 PBS/BSA) or anti-PGRMC2 (F-3: sc-374624) (Santa Cruz Biotechnology, Inc.) (1:100 in 3% PBS/BSA)  
435 over-night at 4°C. Secondary antibodies goat anti-mouse IgG conjugated to horseradish peroxidase (1:5000  
436 in 3% PBS/BSA) (Cell Signalling Technology Europe B.V., Leiden, Netherlands) were incubated one hour  
437 at RT. Protein bands were detected using ECL system and visualized on autoradiography film (Hyperfilm  
438 ECL; GE Healthcare, Munich, Germany).

439

#### 440 *Statistics*

441 Statistical analyses were made using the open-source software R version 3.4.2 and R Studio version 1.0.136  
442 (R Core Team, 2017). Unpaired Wilcoxon-Mann-Whitney U-test was performed. During evaluation of the  
443 results a confidence interval alpha of 95% and P values lower than 0.05 were considered as statistically  
444 significant. Results are shown as box plots which give a fast and efficient overview about median, first and  
445 third quartile (25<sup>th</sup> and 75<sup>th</sup> percentile, respectively), interquartile range (IQR), minimal and maximal values  
446 and outliers.

447 Growth curve analysis and growth constant k (slope of linear regression line) calculation was done  
448 using multilevel regression technique using R Studio.



449 **ACKNOWLEDGEMENTS**

450 We thank Waldemar Kanczkowski (Technische Universität Dresden, Dresden, Germany) for providing the  
451 NCI-H295R cells. Barbara Kind (Technische Universität Dresden, Dresden, Germany) generously generated  
452 pseudo retroviruses containing pcz-CFG5.1-GFP-ALADIN and pcz-CFG5.1-GFP. Alexandra Wendler  
453 (Universität Heidelberg, Mannheim, Germany) kindly provided pEGFP-C1-PGRMC1 plasmid.

454

455 **FUNDING**

456 This work was funded by the Deutsche Forschungsgemeinschaft to AH: within the Clinical Research Unit  
457 252 (project HU 895/5-2) and within the CRC/Transregio 205/1 “The adrenal: Central relay in Health and  
458 Disease”. The funders had no role in study design, data collection and analysis, decision to publish, or  
459 preparation of the manuscript.

460

461 **CONFLICT OF INTEREST**

462 The authors declare that they have no conflict of interest.

463

464 **REFERENCES**

Ahmed, I. S. A., Chamberlain, C., and Craven, R. J. (2012). S2R(Pgrmc1): the cytochrome-related sigma-2 receptor that regulates lipid and drug metabolism and hormone signaling. *Expert Opin. Drug Metab. Toxicol.* *8*, 361–370.

Albrecht, C., Huck, V., Wehling, M., and Wendler, A. (2012). In vitro inhibition of SKOV-3 cell migration as a distinctive feature of progesterone receptor membrane component type 2 versus type 1. *Steroids* *77*, 1543–1550.

Allgrove, J., Clayden, G. S., Grant, D. B., and Macaulay, J. C. (1978). Familial glucocorticoid deficiency with achalasia of the cardia and deficient tear production. *Lancet* *1*, 1284–1286.

Ando, S., Yang, H., Nozaki, N., Okazaki, T., and Yoda, K. (2002). CENP-A, -B, and -C Chromatin Complex That Contains the I-Type  $\alpha$ -Satellite Array Constitutes the Prekinetochore in HeLa Cells. *Mol. Cell. Biol.* *22*, 2229–2241.

Bakhoun, S. F., Thompson, S. L., Manning, A. L., and Compton, D. A. (2009). Genome stability is ensured by temporal control of kinetochore-microtubule dynamics. *Nat. Cell Biol.* *11*, 27–35.

Barr, A. R., and Gergely, F. (2007). Aurora-A: the maker and breaker of spindle poles. *J. Cell Sci.* *120*, 2987–2996.

Booth, D. G., Hood, F. E., Prior, I. A., and Royle, S. J. (2011). A TACC3/ch-TOG/clathrin complex stabilises kinetochore fibres by inter-microtubule bridging. *EMBO J.* *30*, 906–919.

Cahill, M. A. (2017). The evolutionary appearance of signaling motifs in PGRMC1. *Biosci. Trends.* *11*, 179–192.

Cahill, M. A., and Medlock, A. E. (2017). Thoughts on interactions between PGRMC1 and diverse attested and potential hydrophobic ligands. *J. Steroid Biochem. Mol. Biol.* *171*, 11–33.

Carvalho, S., Ribeiro, S. A., Arocena, M., Kasciukovic, T., Temme, A., Koehler, K., Huebner, A., and

- Griffis, E. R. (2015). The nucleoporin ALADIN regulates Aurora A localization to ensure robust mitotic spindle formation. *Mol. Biol. Cell* *26*, 3424–3438.
- Carvalho, S., Stevense, M., Koehler, K., Naumann, R., Huebner, A., Jessberger, R., and Griffis, E. R. (2017). ALADIN is required for the production of fertile mouse oocytes. *Mol. Biol. Cell* *28*, 2470–2478.
- Clark, N. C., Friel, A. M., Pru, C. A., Zhang, L., Shioda, T., Rueda, B. R., Peluso, J. J., and Pru, J. K. (2016). Progesterone receptor membrane component 1 promotes survival of human breast cancer cells and the growth of xenograft tumors. *Cancer Biol. Ther.* *17*, 262–271.
- Cronshaw, J. M., and Matunis, M. J. (2003). The nuclear pore complex protein ALADIN is mislocalized in triple A syndrome. *Proc. Natl. Acad. Sci. U. S. A.* *100*, 5823–5827.
- Fahrenkrog, B. (2014). Nucleoporin Gene Fusions and Hematopoietic Malignancies. *New J. Sci.* *2014*, Article ID 468306.
- Falkenstein, E., Meyer, C., Eisen, C., Scriba, P. C., and Wehling, M. (1996). Full-length cDNA sequence of a progesterone membrane-binding protein from porcine vascular smooth muscle cells. *Biochem. Biophys. Res. Commun.* *229*, 86–89.
- Glotzer, M. (2009). The 3Ms of central spindle assembly: microtubules, motors and MAPs. *Nat. Rev. Mol. Cell Biol.* *10*, 9–20.
- Griffin, D., Liu, X., Pru, C., Pru, J. K., and Peluso, J. J. (2014). Expression of progesterone receptor membrane component-2 within the immature rat ovary and its role in regulating mitosis and apoptosis of spontaneously immortalized granulosa cells. *Biol. Reprod.* *91*, 36.
- Gupta, G. D. *et al.* (2015). A Dynamic Protein Interaction Landscape of the Human Centrosome-Cilium Interface. *Cell* *163*, 1484–1499.
- Handschug, K., Sperling, S., Yoon, S. J., Hennig, S., Clark, A. J., and Huebner, A. (2001). Triple A syndrome is caused by mutations in AAAS, a new WD-repeat protein gene. *Hum. Mol. Genet.* *10*, 283–290.
- Hanson, D., Stevens, A., Murray, P. G., Black, G. C. M., and Clayton, P. E. (2014). Identifying biological pathways that underlie primordial short stature using network analysis. *J. Mol. Endocrinol.* *52*, 333–344.
- Hlavaty, J., Ertl, R., Miller, I., and Gabriel, C. (2016). Expression of Progesterone Receptor Membrane Component 1 (PGRMC1), Progestin and AdipoQ Receptor 7 (PAQPR7), and Plasminogen Activator Inhibitor 1 RNA-Binding Protein (PAIRBP1) in Glioma Spheroids In Vitro. *BioMed Res. Int.* *2016*, 8065830.
- Huebner, A., Kaindl, A. M., Braun, R., and Handschug, K. (2002). New insights into the molecular basis of the triple A syndrome. *Endocr. Res.* *28*, 733–739.
- Hughes, A. L., Powell, D. W., Bard, M., Eckstein, J., Barbuch, R., Link, A. J., and Espenshade, P. J. (2007). Dapl/PGRMC1 binds and regulates cytochrome P450 enzymes. *Cell Metab.* *5*, 143–149.
- Joglekar, A. P., Bloom, K. S., and Salmon, E. D. (2010). Mechanisms of force generation by end-on kinetochore-microtubule attachments. *Curr. Opin. Cell Biol.* *22*, 57–67.
- Jühlen, R., Idkowiak, J., Taylor, A. E., Kind, B., Arlt, W., Huebner, A., and Koehler, K. (2015). Role of ALADIN in Human Adrenocortical Cells for Oxidative Stress Response and Steroidogenesis. *PLoS One* *10*, e0124582.
- Jühlen, R., Landgraf, D., Huebner, A., and Koehler, K. (2016). Identification of a novel putative interaction partner of the nucleoporin ALADIN. *Biol. Open* *5*, 1697–1705.

- Kabe, Y. *et al.* (2016). Haem-dependent dimerization of PGRMC1/Sigma-2 receptor facilitates cancer proliferation and chemoresistance. *Nat. Commun.* *7*, 11030.
- Khodjakov, A., Cole, R. W., Oakley, B. R., and Rieder, C. L. (2000). Centrosome-independent mitotic spindle formation in vertebrates. *Curr. Biol.* *10*, 59–67.
- Kind, B., Koehler, K., Krumbholz, M., Landgraf, D., and Huebner, A. (2010). Intracellular ROS level is increased in fibroblasts of triple A syndrome patients. *J. Mol. Med.* *88*, 1233–1242.
- Kind, B., Koehler, K., Lorenz, M., and Huebner, A. (2009). The nuclear pore complex protein ALADIN is anchored via NDC1 but not via POM121 and GP210 in the nuclear envelope. *Biochem. Biophys. Res. Commun.* *390*, 205–210.
- Krumbholz, M., Koehler, K., and Huebner, A. (2006). Cellular localization of 17 natural mutant variants of ALADIN protein in triple A syndrome - shedding light on an unexpected splice mutation. *Biochem. Cell Biol.* *84*, 243–249.
- Lee, H.-C., Yin, P.-H., Chi, C.-W., and Wei, Y.-H. (2002). Increase in mitochondrial mass in human fibroblasts under oxidative stress and during replicative cell senescence. *J. Biomed. Sci.* *9*, 517–526.
- Lodde, V., and Peluso, J. J. (2011). A novel role for progesterone and progesterone receptor membrane component 1 in regulating spindle microtubule stability during rat and human ovarian cell mitosis. *Biol. Reprod.* *84*, 715–722.
- Luciano, A. M., Lodde, V., Franciosi, F., Cecilian, F., and Peluso, J. J. (2010). Progesterone receptor membrane component 1 expression and putative function in bovine oocyte maturation, fertilization, and early embryonic development. *Reprod. Camb. Engl.* *140*, 663–672.
- Mahoney, N. M., Goshima, G., Douglass, A. D., and Vale, R. D. (2006). Making microtubules and mitotic spindles in cells without functional centrosomes. *Curr. Biol.* *16*, 564–569.
- Malik, R., Lenobel, R., Santamaria, A., Ries, A., Nigg, E. A., and Körner, R. (2009). Quantitative analysis of the human spindle phosphoproteome at distinct mitotic stages. *J. Proteome Res.* *8*, 4553–4563.
- Marumoto, T., Zhang, D., and Saya, H. (2005). Aurora-A - a guardian of poles. *Nat. Rev. Cancer* *5*, 42–50.
- Mastrorarde, D. N., McDonald, K. L., Ding, R., and McIntosh, J. R. (1993). Interpolar spindle microtubules in PTK cells. *J. Cell Biol.* *123*, 1475–1489.
- McCloy, R. A. *et al.* (2015). Global Phosphoproteomic Mapping of Early Mitotic Exit in Human Cells Identifies Novel Substrate Dephosphorylation Motifs. *Mol. Cell. Proteomics* *14*, 2194–2212.
- McEwen, B. F., Heagle, A. B., Cassels, G. O., Buttle, K. F., and Rieder, C. L. (1997). Kinetochores fiber maturation in PtK1 cells and its implications for the mechanisms of chromosome congression and anaphase onset. *J. Cell Biol.* *137*, 1567–1580.
- Meunier, S., and Vernos, I. (2012). Microtubule assembly during mitosis – from distinct origins to distinct functions? *J Cell Sci* *125*, 2805–2814.
- National Center for Biotechnology Information, U.S. National Library of Medicine (2013). Basic Local Alignment Search Tool, Bethesda MD, USA.
- Nofrini, V., Di Giacomo, D., and Mecucci, C. (2016). Nucleoporin genes in human diseases. *Eur. J. Hum. Genet. EJHG* *24*, 1388–1395.
- Pandey, A. V., and Flück, C. E. (2013). NADPH P450 oxidoreductase: structure, function, and pathology of

diseases. *Pharmacol. Ther.* *138*, 229–254.

Peluso, J. J., Griffin, D., Liu, X., and Horne, M. (2014). Progesterone receptor membrane component-1 (PGRMC1) and PGRMC-2 interact to suppress entry into the cell cycle in spontaneously immortalized rat granulosa cells. *Biol. Reprod.* *91*, 1-12.

Piel, R. B., Shiferaw, M. T., Vashisht, A. A., Marcero, J. R., Praissman, J. L., Phillips, J. D., Wohlschlegel, J. A., and Medlock, A. E. (2016). A Novel Role for Progesterone Receptor Membrane Component 1 (PGRMC1): A Partner and Regulator of Ferrochelatase. *Biochemistry (Mosc.)*. *55*, 5204-5217.

R Core Team (2017). R: A language and environment for statistical computing, Vienna, Austria: R Foundation for Statistical Computing.

Rabut, G., Doye, V., and Ellenberg, J. (2004). Mapping the dynamic organization of the nuclear pore complex inside single living cells. *Nat. Cell Biol.* *6*, 1114–1121.

Rosenblatt, J. (2005). Spindle assembly: asters part their separate ways. *Nat. Cell Biol.* *7*, 219–222.

Ryu, C. S., Klein, K., and Zanger, U. M. (2017). Membrane Associated Progesterone Receptors: Promiscuous Proteins with Pleiotropic Functions - Focus on Interactions with Cytochromes P450. *Front. Pharmacol.* *8*, 159.

Sakuma, S., and D'Angelo, M. A. (2017). The roles of the nuclear pore complex in cellular dysfunction, aging and disease. *Semin. Cell Dev. Biol.* *68*, 72–84.

Scholey, J. M., Brust-Mascher, I., and Mogilner, A. (2003). Cell division. *Nature* *422*, 746–752.

Tullio-Pelet, A. *et al.* (2000). Mutant WD-repeat protein in triple-A syndrome. *Nat. Genet.* *26*, 332–335.

Vanneste, D., Ferreira, V., and Vernos, I. (2011). Chromokinesins: localization-dependent functions and regulation during cell division. *Biochem. Soc. Trans.* *39*, 1154–1160.

Wendler, A., and Wehling, M. (2013). PGRMC2, a yet uncharacterized protein with potential as tumor suppressor, migration inhibitor, and regulator of cytochrome P450 enzyme activity. *Steroids* *78*, 555–558.

Yamazumi, Y., Kamiya, A., Nishida, A., Nishihara, A., Iemura, S., Natsume, T., and Akiyama, T. (2009). The transmembrane nucleoporin NDC1 is required for targeting of ALADIN to nuclear pore complexes. *Biochem. Biophys. Res. Commun.* *389*, 100–104.

Zhai, Y., Kronebusch, P. J., and Borisy, G. G. (1995). Kinetochores microtubule dynamics and the metaphase-anaphase transition. *J. Cell Biol.* *131*, 721–734.

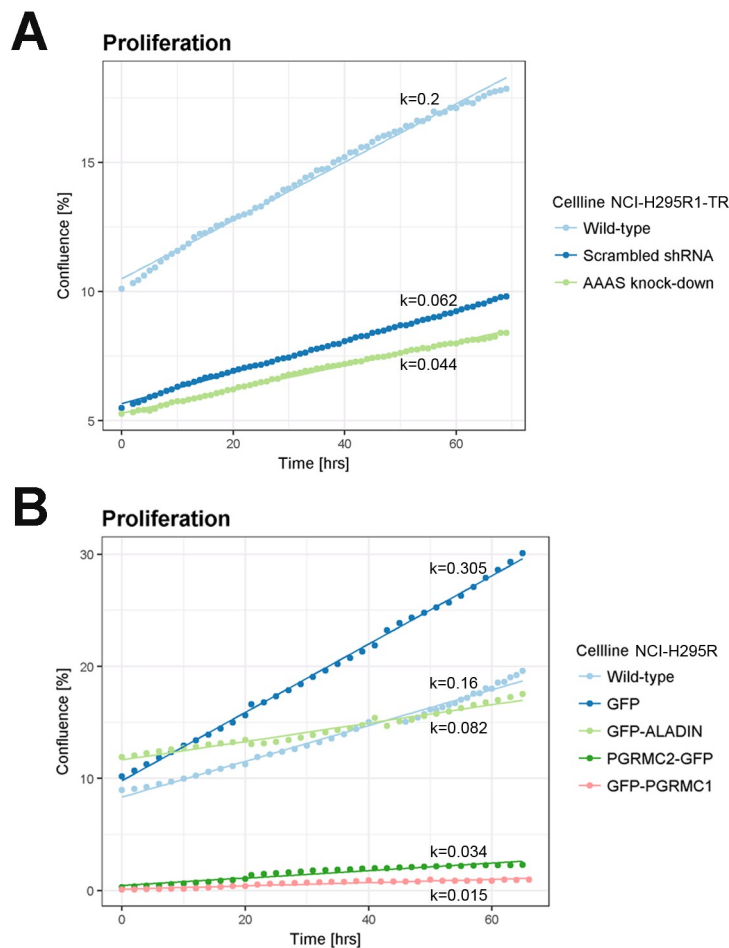

466 **Figure 1. Cellular proliferation is impaired upon over-expression of ALADIN, PGRMC1 or PGRMC2.**  
467 Equal cell numbers were seeded 48 hours before confluence measurement using live cell imaging on  
468 IncuCyte Zoom (Essen BioScience). In case of transient transfection with PGRMC2-GFP and GFP-  
469 PGRMC1 the proliferation of fluorescent cells was measured which starts at cell density of about zero.  
470 Growth curve analysis and growth constant  $k$  (slope of regression curve) calculation was done using  
471 multilevel regression technique using R Studio.

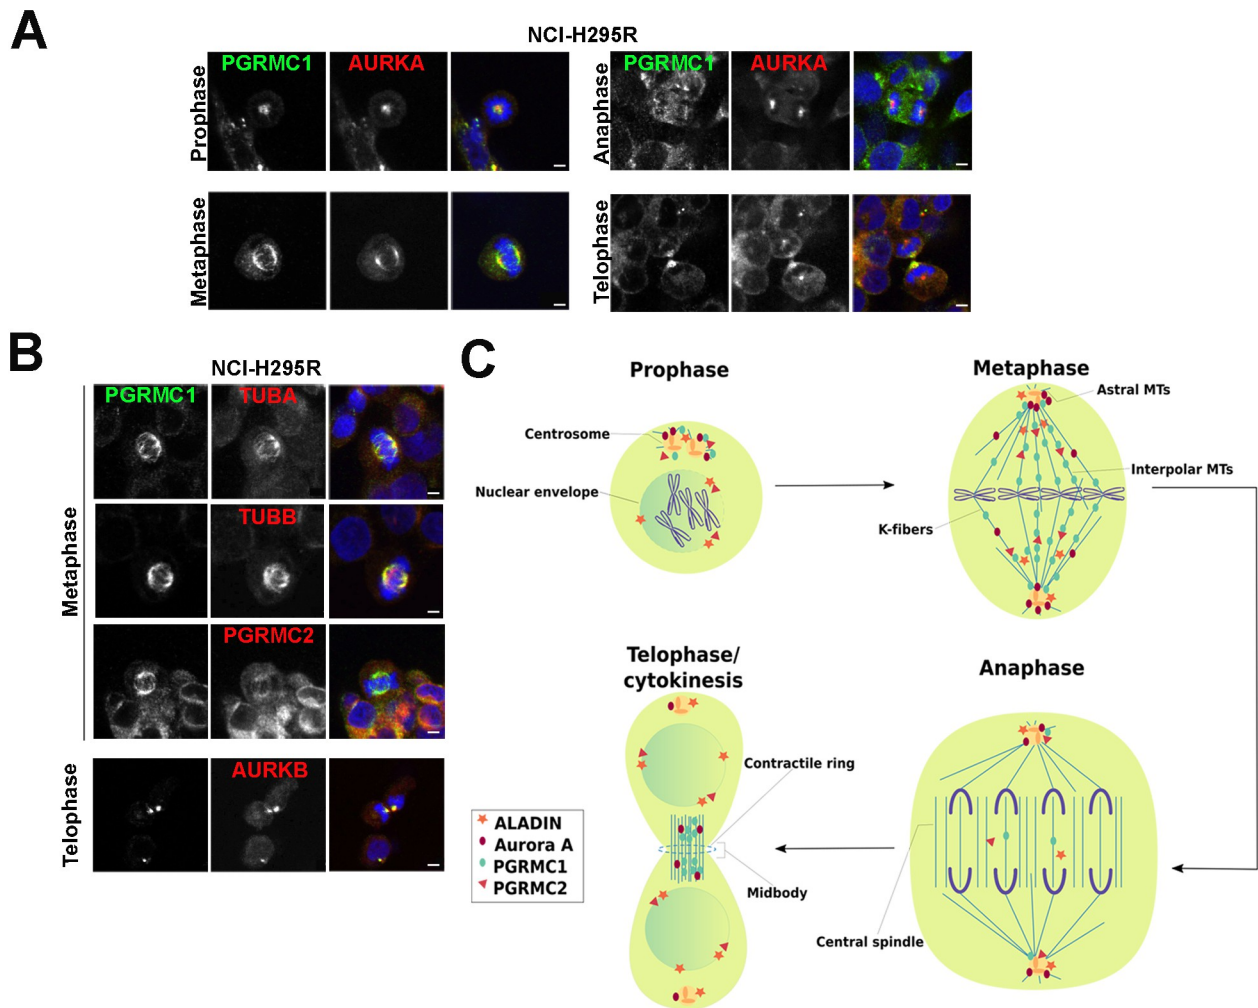

472 **Figure 2. PGRMC1 is restricted to the mitotic spindle and to the mid-body during cytokinesis.** (A)  
 473 Human adrenocortical NCI-H295R cells at different cell division stages were stained with anti-PGRMC1  
 474 (green), anti-Aurora kinase A (AURKA) (red) and DAPI (blue). (B) Human adrenocortical NCI-H295R cells  
 475 at meta- and telophase were stained with anti-PGRMC1 (green), anti- $\alpha$ -tubulin (TUBA) (red), anti- $\beta$ -tubulin  
 476 (TUB) (red), anti-PGRMC2 (red), anti-Aurora kinase B (AURKB) (red) and DAPI (blue). Scale bars: 5  $\mu$ m.  
 477 (C) Schematic drawing of cellular localization of ALADIN, Aurora kinase A, PGRMC1 and PGRMC2  
 478 during mitosis. MT, microtubule.

479



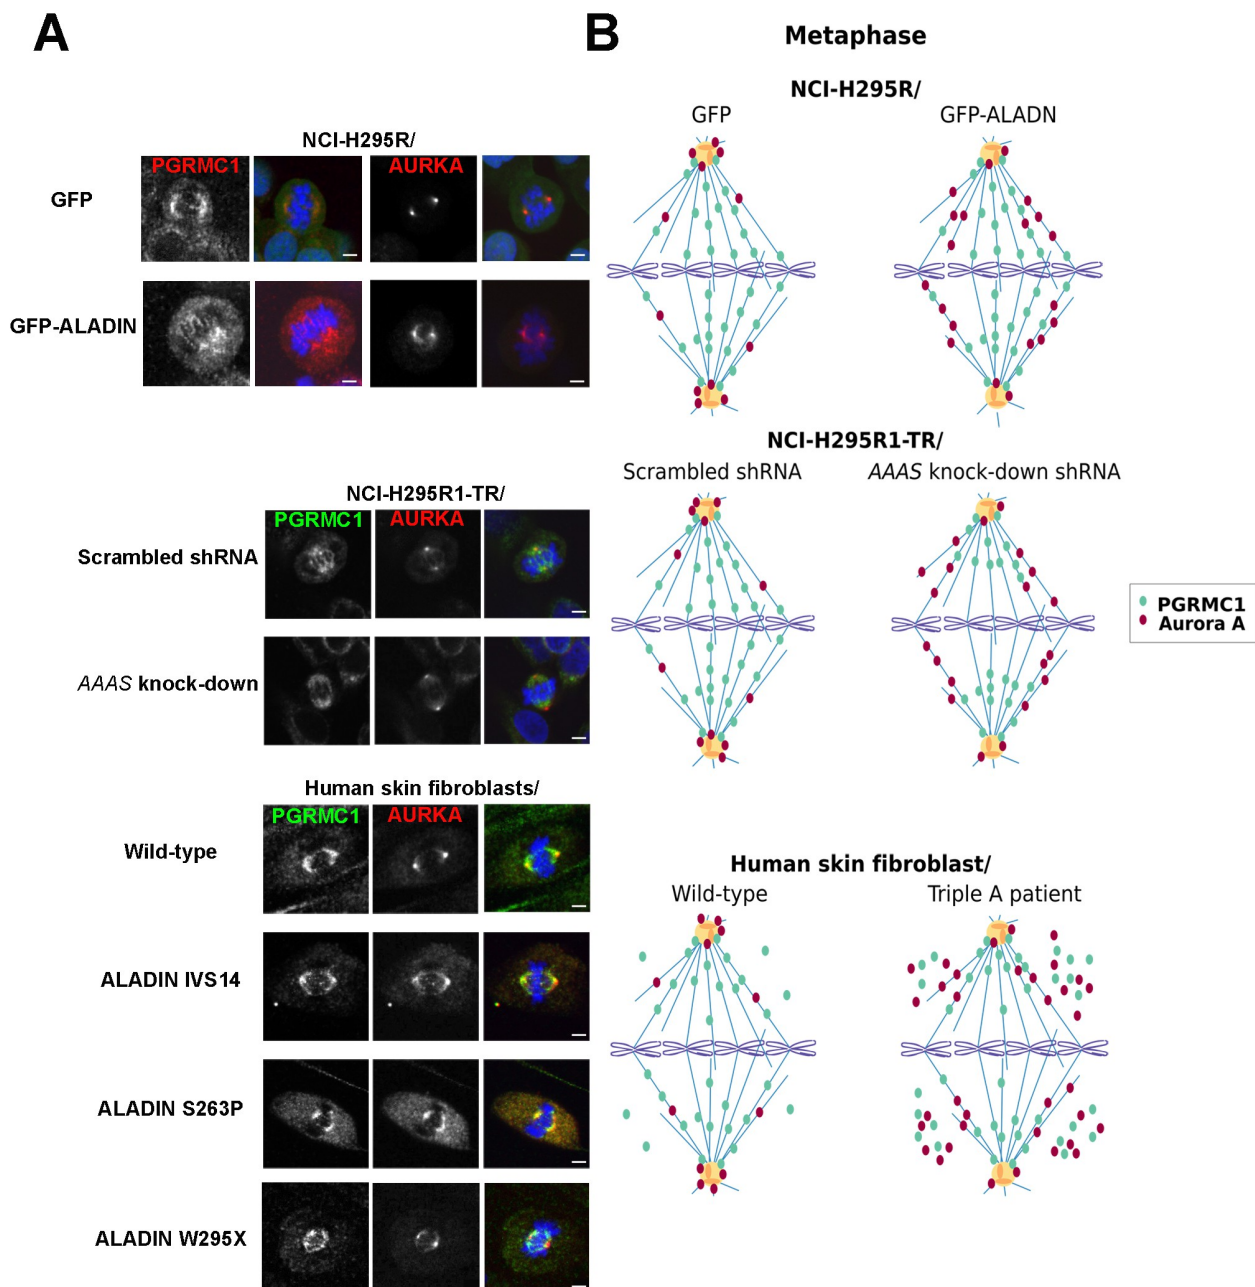

480 **Figure 3. Loss of ALADIN mis-localizes PGRMC1 and Aurora kinase A during mitosis.** (A) Human  
 481 adrenocortical NCI-H295R GFP and GFP-ALADIN over-expressing cells, NCI-H295R1-TR scrambled  
 482 shRNA and *AAAS* shRNA (*AAAS* knock-down) cells and human skin fibroblasts of healthy wild-type donors  
 483 and triple A syndrome patients were stained with anti-PGRMC1 (green), anti-Aurora kinase A (AURKA)  
 484 (red) and DAPI (blue). The different mutations in the human ALADIN protein are denoted as IVS14, S263P  
 485 and W295X. Scale bars 5  $\mu$ m, but for NCI-H295R GFP over-expressing cells: 10  $\mu$ m. (B) Schematic  
 486 drawing of the immunofluorescence staining of PGRMC1 and Aurora kinase A in (A).  
 487

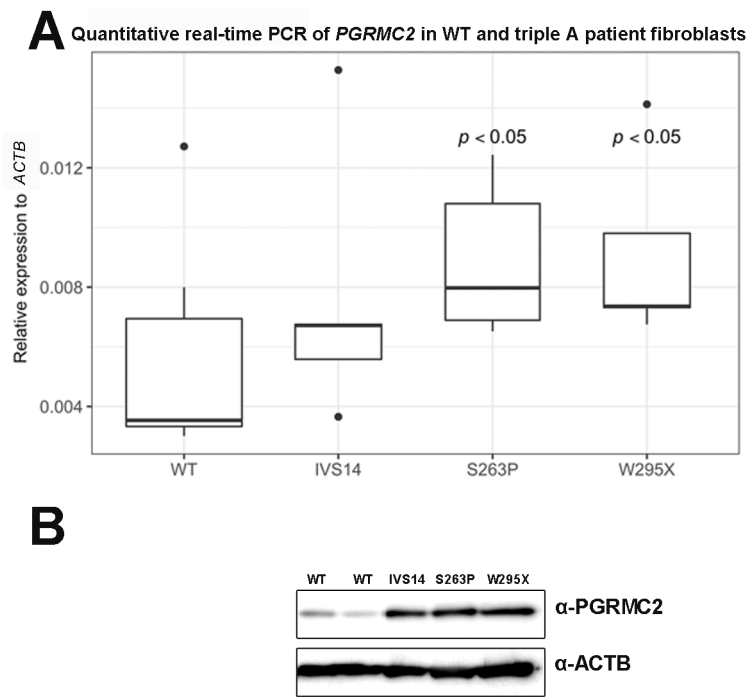

488 **Figure 4. PGRMC2 is over-expressed in triple A patient fibroblasts.** (A) Total RNA was isolated from  
489 human skin fibroblasts of healthy wild-type donors and patients with triple A syndrome. The different  
490 mutations in the human ALADIN protein are denoted on the x-axis of the diagram: IVS14, S263P and  
491 W295X. WT, wild-type. Significant differences were measured with unpaired Wilcoxon–Mann–Whitney U-  
492 test. Boxplot widths are proportional to the square root of the samples sizes. Whiskers indicate the range  
493 outside 1.5 times the inter-quartile range (IQR) above the upper quartile and below the lower quartile.  
494 Outliers were plotted as dots. (B) Total protein was isolated from human skin fibroblasts of healthy wild-type  
495 donors and triple A patients followed by western blot with indicated antibodies.  
496

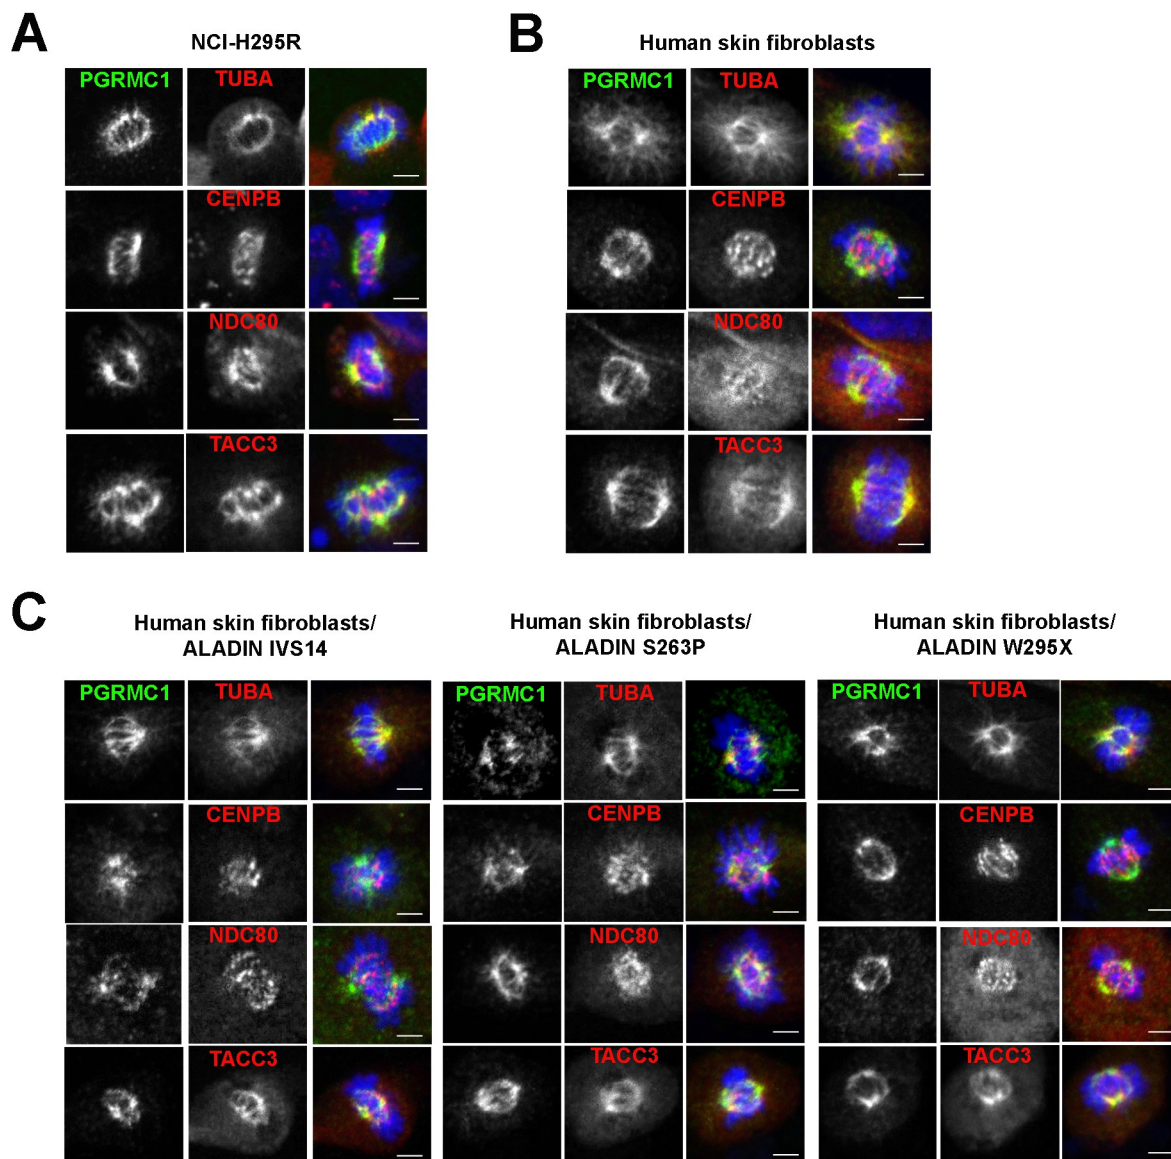

497 **Figure 5. PGRMC1 localizes to cold-stable kinetochore fibers.** Cells were cold-treated and stained with  
498 anti-PGRMC1 (green), anti- $\alpha$ -tubulin (TUBA) (red), anti-CENPB (red), anti-NDC80 (red), anti-TACC3  
499 (red) and DAPI (blue). (A) Human adrenocortical NCI-H295R cells. (B) Human skin fibroblasts of healthy  
500 wild-type donors. (C) Human skin fibroblasts of triple A patients. The different mutations in the human  
501 ALADIN protein are denoted as IVS14, S263P and W295X. Scale bars 5  $\mu$ m.
